# Supplementary material for: Computational data mining method for isotopomer analysis in the quantitative assessment of metabolic reprogramming
Source: PubMed Central journal article supplement (PMC6959353; doi:10.1038/s41598-019-57146-8), 2020-01-14
Supplement: 41598_2019_57146_MOESM1_ESM.pdf [file 41598_2019_57146_MOESM1_ESM.pdf]

**Supplementary Figure S1** Relationship between the population size and Cohen's effect size ( $d$ ). Cohen's effect sizes ( $d$ ) were determined for  $\log([\text{IDHreverse}]/[\text{CS}])$  and  $\log([\text{PC}]/[\text{CS}])$  of the populations, at different population sizes.

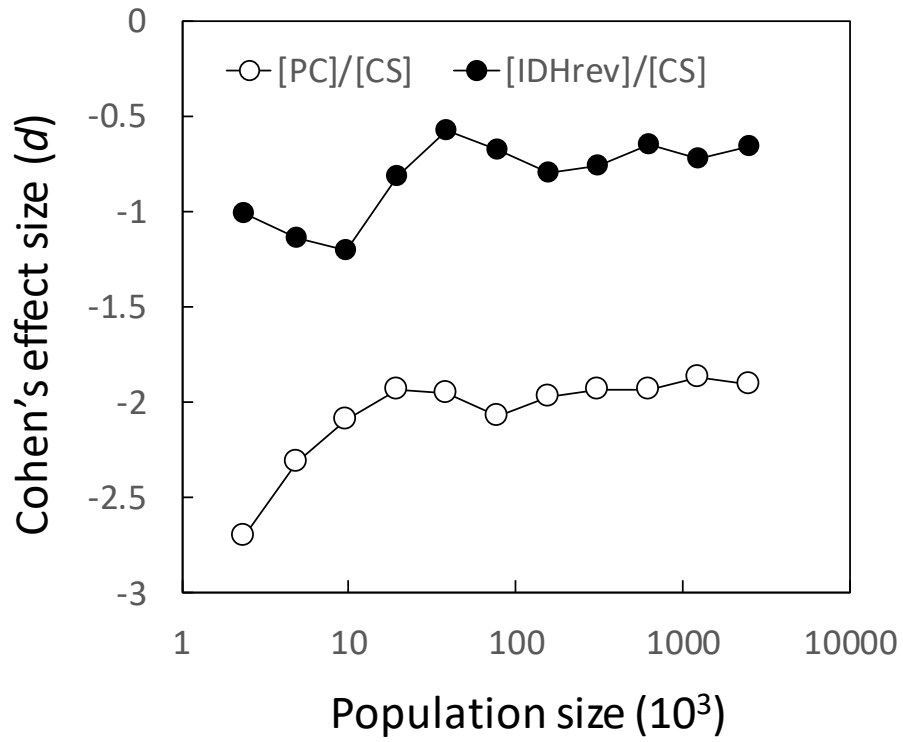

**Supplementary Table S1 Abbreviations of metabolites and reactions**

|       |                                   |                                          |
|-------|-----------------------------------|------------------------------------------|
| PGI   | Phosphoglucosomerase              | G6P $\leftrightarrow$ F6P                |
| PFK   | Phosphofruktokinase               | F6P $\rightarrow$ FBP                    |
| FBA   | Aldolase                          | FBP $\leftrightarrow$ DHAP+GAP           |
| TPI   | Triose isomerase                  | DHAP $\leftrightarrow$ GAP               |
| PGK   | Phosphoglycerate kinase           | GAP $\leftrightarrow$ PGA                |
| ENO   | Enolase                           | PGA $\leftrightarrow$ PEP                |
| PYK   | Pyruvate kinase                   | PEP $\rightarrow$ Pyr                    |
| PDH   | Pyruvate dehydrogenase            | Pyr $\rightarrow$ AcCoA+CO <sub>2</sub>  |
| CS    | Citrate synthase                  | AcCoA+Oxa $\rightarrow$ IsoCit           |
| IDH   | Isocitrate dehydrogenase          | IsoCit $\rightarrow$ aKG+CO <sub>2</sub> |
| 2KGDH | 2-Ketoglutarate dehydrogenase     | aKG $\rightarrow$ Suc+CO <sub>2</sub>    |
| SDH   | Succinate dehydrogenase           | Suc $\leftrightarrow$ Fum                |
| FH    | Fumarase                          | Fum $\leftrightarrow$ Mal                |
| MDH   | Malate dehydrogenase              | Mal $\leftrightarrow$ Oxa                |
| G6PDH | Glucose-6-phosphate dehydrogenase | G6P $\rightarrow$ 6PG                    |
| 6PGDH | 6-phosphogluconate dehydrogenase  | m6PG $\rightarrow$ Ru5P+CO <sub>2</sub>  |
| RPE   | Ribulose-5-phosphate epimerase    | Ru5P $\leftrightarrow$ R5P               |
| RPI   | Ribose-5-phosphate isomerase      | RU5P $\leftrightarrow$ Xu5P              |
| TKL1  | Transketolase                     | E4P+Xu5P $\leftrightarrow$ F6P+GAP       |
| TKL2  | Transketolase                     | R5P+Xu5P $\leftrightarrow$ S7P+GAP       |
| TAL   | Transaldolase                     | GAP+S7P $\leftrightarrow$ F6P+E4P        |
| MAE   | Malic enzyme                      | Mal $\rightarrow$ Pyr+CO <sub>2</sub>    |
| PC    | Pyruvate carboxylase              | Pyr+CO <sub>2</sub> $\rightarrow$ Oxa    |
| ACLY  | ATP citrate lyase                 | IsoCit+AcCoA $\rightarrow$ Mal+Suc       |
| LDH   | Lactate dehydrogenase             | Pyr $\rightarrow$ Lactate                |
| G6P   | Glucose-6-phosphate               |                                          |
| F6P   | Fructose 6-phosphate              |                                          |
| FBP   | Fructose-1,6-bisphosphate         |                                          |
| DHAP  | Dihydroxyacetone phosphate        |                                          |
| GAP   | Glyceraldehyde 3-phosphate        |                                          |
| 6PG   | 6-Phosphogluconate                |                                          |
| Ru5P  | Ribulose 5-phosphate              |                                          |
| R5P   | Ribose 5-phosphate                |                                          |

|        |                                     |
|--------|-------------------------------------|
| S7P    | Sedoheptulose 7-phosphate           |
| E4P    | Erythrose 4-phosphate               |
| Xu5P   | Xylulose 5-phosphate                |
| 3PG    | 3-Phosphoglycerate                  |
| PEP    | Phosphoenolpyruvate                 |
| Pyr    | Pyruvate                            |
| AcCoA  | Acetyl-CoA                          |
| Cit    | Citrate                             |
| IsoCit | Isocitrate                          |
| 2KG    | 2-ketoglutaric acid                 |
| Suc    | Succinate                           |
| Fum    | Fumarate                            |
| Mal    | Malate                              |
| Oxa    | Oxaloacetic acid                    |
| Gln    | Glutamine                           |
| EMPP   | Embden–Meyerhof–Parnas pathway      |
| oxPPP  | oxidative pentose phosphate pathway |
| Glu    | Glutamate                           |

---

**Supplementary Table S2.** Mass isotopomer distribution vector (MDV) data obtained from literatures

| Metabolite                                  | Isotopomer | Intensity (rel.) | Standard deviation |
|---------------------------------------------|------------|------------------|--------------------|
| Araki et al (2017) MCF-7 control            |            |                  |                    |
| Cit                                         | m0         | 0.319            | 0.015              |
| Cit                                         | m1         | 0.039            | 0.015              |
| Cit                                         | m2         | 0.104            | 0.015              |
| Cit                                         | m3         | 0.170            | 0.015              |
| Cit                                         | m4         | 0.186            | 0.015              |
| Cit                                         | m5         | 0.160            | 0.015              |
| Araki et al (2017) MCF-7 paclitaxel treated |            |                  |                    |
| Cit                                         | m0         | 0.511            | 0.015              |
| Cit                                         | m1         | 0.069            | 0.015              |
| Cit                                         | m2         | 0.087            | 0.015              |
| Cit                                         | m3         | 0.112            | 0.015              |
| Cit                                         | m4         | 0.098            | 0.015              |
| Cit                                         | m5         | 0.120            | 0.015              |
| Muller et al (2012) Wild type 143B          |            |                  |                    |
| Fum                                         | m0         | 0.35             | 0.02               |
| Fum                                         | m1         | 0.07             | 0.02               |
| Fum                                         | m2         | 0.14             | 0.02               |
| Fum                                         | m3         | 7.00E-02         | 0.015              |
| Cit                                         | m0         | 0.33             | 0.015              |
| Cit                                         | m1         | 0.075            | 0.015              |
| Cit                                         | m2         | 0.155            | 0.015              |
| Cit                                         | m3         | 0.065            | 0.015              |
| Cit                                         | m4         | 0.31             | 0.015              |
| Cit                                         | m5         | 0.025            | 0.015              |
| Mullen et al (2012) CYTB 143B               |            |                  |                    |
| Fum                                         | m0         | 0.455            | 0.02               |
| Fum                                         | m1         | 0.015            | 0.015              |
| Fum                                         | m2         | 0.065            | 0.015              |
| Fum                                         | m3         | 0.39             | 0.03               |
| Cit                                         | m0         | 0.46             | 0.07               |
| Cit                                         | m1         | 0.065            | 0.03               |
| Cit                                         | m2         | 0.08             | 0.04               |
| Cit                                         | m3         | 0.14             | 0.02               |
| Cit                                         | m4         | 0.03             | 0.04               |
| Cit                                         | m5         | 0.245            | 0.045              |
| Andrzejewski et al (2014) MCF7 control      |            |                  |                    |
| Cit                                         | m0         | 0.43             | 0.015              |
| Cit                                         | m2         | 0.44             | 0.015              |

|     |    |      |       |
|-----|----|------|-------|
| Cit | m4 | 0.05 | 0.015 |
| 2KG | m0 | 0.83 | 0.015 |
| 2KG | m2 | 0.12 | 0.015 |

Andrzejewski et al (2014) MCF7 5 mM metformin treated

|     |    |       |       |
|-----|----|-------|-------|
| Cit | m0 | 0.54  | 0.015 |
| Cit | m2 | 0.35  | 0.015 |
| Cit | m4 | 0.025 | 0.015 |
| 2KG | m0 | 0.88  | 0.015 |
| 2KG | m2 | 0.07  | 0.015 |

Mullen et al (2012) 143B control (DMSO)

|     |    |          |       |
|-----|----|----------|-------|
| Fum | m0 | 0.425    | 0.05  |
| Fum | m3 | 0.04     | 0.015 |
| Fum | m4 | 0.27     | 0.03  |
| Cit | m0 | 0.41     | 0.03  |
| Cit | m4 | 0.25     | 0.03  |
| Cit | m5 | 0.015    | 0.01  |
| Mal | m0 | 0.455    | 0.05  |
| Mal | m3 | 0.045    | 0.015 |
| Mal | m4 | 2.60E-01 | 0.02  |

Mullen et al (2012) 143B 10 mM metformin treated

|     |    |          |       |
|-----|----|----------|-------|
| Fum | m0 | 0.35     | 0.02  |
| Fum | m3 | 0.43     | 0.015 |
| Fum | m4 | 0.16     | 0.015 |
| Cit | m0 | 0.29     | 0.015 |
| Cit | m4 | 0.08     | 0.03  |
| Cit | m5 | 0.33     | 0.04  |
| Mal | m0 | 0.36     | 0.02  |
| Mal | m3 | 0.425    | 0.02  |
| Mal | m4 | 1.40E-01 | 0.015 |

---

**Supplementary Table S3.** Metabolic model used in this study.

| <b>Reaction ID</b> | <b>Stoichiometry</b>     | <b>Atom mapping</b>             | <b>Fixed/free</b> | <b>Lower boundary</b> | <b>Upper boundary</b> |
|--------------------|--------------------------|---------------------------------|-------------------|-----------------------|-----------------------|
| r1_Subsglc         | SubsGlc --> G6P          | ABCDEF --> ABCDEF               | fixed             | 100                   | 100                   |
| r2_pgi             | G6P --> F6P              | ABCDEF --> ABCDEF               | free              | 0.0001                | 1000                  |
| r3_pgi             | F6P --> G6P              | ABCDEF --> ABCDEF               | free              | 0.0001                | 1000                  |
| r4_pfk             | F6P --> FBP              | ABCDEF --> ABCDEF               | free              | 0.0001                | 1000                  |
| r5_fba             | FBP --> DHAP + GAP       | ABCDEF --> CBA + DEF            | free              | 0.0001                | 1000                  |
| r6_fba             | DHAP + GAP --> FBP       | CBA + DEF --> ABCDEF            | free              | 0.0001                | 1000                  |
| r7_tpi             | DHAP --> GAP             | ABC --> ABC                     | free              | 0.0001                | 1000                  |
| r8_tpi             | GAP --> DHAP             | ABC --> ABC                     | free              | 500                   | 1000                  |
| r9_gapdh           | GAP --> PGA              | ABC --> ABC                     | free              | 0.0001                | 1000                  |
| r10_gapdh          | PGA --> GAP              | ABC --> ABC                     | free              | 0.0001                | 1000                  |
| r11_peph           | PGA --> PEP              | ABC --> ABC                     | free              | 0.0001                | 1000                  |
| r12_peph           | PEP --> PGA              | ABC --> ABC                     | free              | 0.0001                | 1000                  |
| r13_pk             | PEP --> Pyr              | ABC --> ABC                     | free              | 0.0001                | 1000                  |
| r16_pyrdh          | Pyr --> AcCOAmit + CO2in | ABC --> BC + A                  | free              | 0.0001                | 1000                  |
| r17_cs             | AcCOAmit + Oxa --> Cit   | AB + CDEF --> FEDBAC            | free              | 0.0001                | 1000                  |
| r18_idh            | Cit --> aKG + CO2in      | ABCDEF --> ABCDE + F            | free              | 0.0001                | 1000                  |
| r19_idh            | aKG + CO2in --> Cit      | ABCDE + F --> ABCDEF            | free              | 0.0001                | 1000                  |
| r20_akgdh          | aKG --> Suc + CO2in      | ABCDE --> BCDE + A              | free              | 0.0001                | 1000                  |
| r21_sdh            | Suc --> Fum              | ABCD --> ABCD                   | free              | 0.0001                | 1000                  |
| r22_sdh            | Fum --> Suc              | ABCD --> ABCD                   | free              | 0.0001                | 1000                  |
| r23_fh             | Fum --> Mal              | ABCD --> ABCD                   | free              | 0.0001                | 1000                  |
| r24_fh             | Mal --> Fum              | ABCD --> ABCD                   | free              | 0.0001                | 1000                  |
| r25_mdh            | Mal --> Oxa              | ABCD --> ABCD                   | free              | 0.0001                | 1000                  |
| r26_mdh            | Oxa --> Mal              | ABCD --> ABCD                   | free              | 0.0001                | 1000                  |
| r27_pc             | Pyr + CO2in --> Oxa      | ABC + D --> ABCD                | free              | 0.0001                | 1000                  |
| r28_mae            | Mal --> Pyr + CO2in      | ABCD --> ABC + D                | free              | 0.0001                | 1000                  |
| r29_g6pdh          | G6P --> m6PG             | ABCDEF --> ABCDEF               | free              | 0.0001                | 1000                  |
| r30_pgd            | m6PG --> Ru5P + CO2in    | ABCDEF --> BCDEF + A            | free              | 0.0001                | 1000                  |
| r31_ri             | Ru5P --> R5P             | ABCDE --> ABCDE                 | free              | 0.0001                | 1000                  |
| r32_ri             | R5P --> Ru5P             | ABCDE --> ABCDE                 | free              | 0.0001                | 1000                  |
| r33_rbe            | Ru5P --> Xu5P            | ABCDE --> ABCDE                 | free              | 0.0001                | 1000                  |
| r34_rbe            | Xu5P --> Ru5P            | ABCDE --> ABCDE                 | free              | 0.0001                | 1000                  |
| r35_tkt            | R5P + Xu5P --> S7P + GAP | ABCDE + FGHIJ --> FGABCDE + HIJ | free              | 0.0001                | 1000                  |
| r36_tkt            | GAP + S7P --> Xu5P + R5P | HIJ + FGABCDE --> FGHIJ + ABCDE | free              | 0.0001                | 1000                  |
| r37_tal            | GAP + S7P --> F6P + E4P  | ABC + DEFGHIJ --> DEFABC + GHIJ | free              | 0.0001                | 1000                  |
| r38_tal            | E4P + F6P --> S7P + GAP  | GHIJ + DEFABC --> DEFGHIJ + ABC | free              | 0.0001                | 1000                  |
| r39_tkt            | E4P + Xu5P --> F6P + GAP | ABCD + EFGHI --> EFABCD + GHI   | free              | 0.0001                | 1000                  |
| r40_tkt            | GAP + F6P --> Xu5P + E4P | GHI + EFABCD --> EFGHI + ABCD   | free              | 0.0001                | 1000                  |

|               |                           |                      |      |        |      |
|---------------|---------------------------|----------------------|------|--------|------|
| r41_ldh       | Pyr --> Lac               | ABC --> ABC          | free | 0.0001 | 1000 |
| r42_Lac_ex    | Lac --> LacEx             | nd                   | free | 50     | 200  |
| r46_SubstGln  | SubstGln --> Gln          | ABCDE --> ABCDE      | free | 5      | 50   |
| r47_gls       | Gln --> Glu               | ABCDE --> ABCDE      | free | 0.0001 | 1000 |
| r48_gls       | Glu --> Gln               | ABCDE --> ABCDE      | free | 0.0001 | 1000 |
| r49_gludh     | Glu --> aKG               | ABCDE --> ABCDE      | free | 0.0001 | 1000 |
| r50_gludh     | aKG --> Glu               | ABCDE --> ABCDE      | free | 0.0001 | 1000 |
| r82_acl       | Cit --> AcCOAcyt + Malcyt | FEDBAC --> AB + CDEF | free | 0.0001 | 1000 |
| r83_Malt1     | Malcyt --> Mal            | ABCDE --> ABCDE      | free | 0.0001 | 1000 |
| r83_Malt2     | Mal --> Malcyt            | ABCDE --> ABCDE      | free | 0.0001 | 1000 |
| r83_AcCOA_BIO | AcCOAcyt --> AcCOABiomass | nd                   | free | 0.0001 | 1000 |
| r100_CO2      | CO2in --> CO2Ex           | A --> A              | free | 0.0001 | 1000 |
| r101_CO2      | SubstCO2 --> CO2in        | A --> A              | free | 0.0001 | 1000 |

**Supplementary Table S4.** Reanalysis of literature reported flux ratio analysis

| X               | <i>d</i> -Values for comparison of $\log([X]/[ACLY])$ |                                     |                                      | <i>d</i> -Values for comparison of $\log([X]/[r1\_SubsGlc])$ |  |
|-----------------|-------------------------------------------------------|-------------------------------------|--------------------------------------|--------------------------------------------------------------|--|
|                 | Fig. 4a: WT<br>143B vs CYTB<br>143B                   | Fig. 4b: 5mM<br>Metformin<br>(MCF7) | Fig. 4c: 10mM<br>Metformin<br>(143B) | Fig. 4d: 500microM<br>H2O2 (Skin fibroblast)                 |  |
| r1_SubsGlc      | 4.34                                                  | -0.32                               | 3.62                                 | nd                                                           |  |
| PGI             | 1.72                                                  | -0.06                               | 1.28                                 | -0.83                                                        |  |
| r4_pfk          | 4.31                                                  | -0.28                               | 3.52                                 | -0.96                                                        |  |
| FBA             | 4.31                                                  | -0.28                               | 3.52                                 | -0.96                                                        |  |
| TPI             | 4.31                                                  | -0.28                               | 3.52                                 | -0.96                                                        |  |
| GAPDH           | 4.39                                                  | -0.30                               | 3.62                                 | -0.96                                                        |  |
| PEPH            | 4.39                                                  | -0.30                               | 3.62                                 | -0.96                                                        |  |
| r13_pk          | 4.39                                                  | -0.30                               | 3.62                                 | -0.96                                                        |  |
| r41_ldh         | 5.14                                                  | 0.04                                | 4.29                                 | -0.04                                                        |  |
| r29_g6pdh       | 1.29                                                  | -0.32                               | 1.47                                 | 0.94                                                         |  |
| r30_pgd         | 1.29                                                  | -0.32                               | 1.47                                 | 0.94                                                         |  |
| RPI             | 1.29                                                  | -0.32                               | 1.47                                 | 0.94                                                         |  |
| RBE             | 1.29                                                  | -0.32                               | 1.47                                 | 0.94                                                         |  |
| TKT1            | 1.29                                                  | -0.32                               | 1.47                                 | 0.94                                                         |  |
| TAL             | 1.29                                                  | -0.32                               | 1.47                                 | 0.94                                                         |  |
| TKT2            | 1.29                                                  | -0.32                               | 1.47                                 | 0.94                                                         |  |
| r27_pc          | 9.57                                                  | 0.27                                | 3.82                                 | -0.01                                                        |  |
| r28_mae         | 8.67                                                  | -0.04                               | 4.85                                 | -0.02                                                        |  |
| r16_pyrdh       | -6.09                                                 | -1.21                               | -4.82                                | -0.03                                                        |  |
| r17_cs          | -6.09                                                 | -1.21                               | -4.82                                | -0.03                                                        |  |
| r20_akgdh       | -0.59                                                 | -0.38                               | -1.24                                | 0.04                                                         |  |
| r18_idh         | 3.31                                                  | -0.58                               | 0.12                                 | 0.12                                                         |  |
| r19_idh         | 5.47                                                  | 1.05                                | 5.20                                 | 0.11                                                         |  |
| SDH             | -0.59                                                 | -0.38                               | -1.24                                | 0.04                                                         |  |
| FH              | -0.59                                                 | -0.38                               | -1.24                                | 0.04                                                         |  |
| r25_mdh         | -0.69                                                 | -0.33                               | 1.30                                 | 0.08                                                         |  |
| r26_mdh         | -0.45                                                 | -0.20                               | 1.34                                 | 0.09                                                         |  |
| r46_Subsgl<br>n | 7.44                                                  | -0.06                               | 5.26                                 | 0.00                                                         |  |
| GLS             | 7.44                                                  | -0.06                               | 5.26                                 | 0.00                                                         |  |



|           |    |      |       |      |       |
|-----------|----|------|-------|------|-------|
| GLUDH     |    | 7.44 | -0.06 | 5.26 | 0.00  |
| r82_acl   | nd | nd   | nd    |      | -0.04 |
| r2_pgi    | nd | nd   | nd    |      | -2.31 |
| r3_pgi    | nd | nd   | nd    |      | -1.80 |
| r5_fba    | nd | nd   | nd    |      | -0.13 |
| r6_fba    | nd | nd   | nd    |      | -0.10 |
| r7_tpi    | nd | nd   | nd    |      | 0.21  |
| r8_tpi    | nd | nd   | nd    |      | 0.24  |
| r9_gapdh  | nd | nd   | nd    |      | -0.06 |
| r10_gapdh | nd | nd   | nd    |      | -0.04 |
| r11_peph  | nd | nd   | nd    |      | -0.08 |
| r12_peph  | nd | nd   | nd    |      | -0.07 |
| r21_sdh   | nd | nd   | nd    |      | 0.12  |
| r22_sdh   | nd | nd   | nd    |      | 0.11  |
| r23_fh    | nd | nd   | nd    |      | -0.08 |
| r24_fh    | nd | nd   | nd    |      | -0.09 |
| r25_mdh   | nd | nd   | nd    |      | 0.08  |
| r26_mdh   | nd | nd   | nd    |      | 0.09  |
| r31_ri    | nd | nd   | nd    |      | 0.13  |
| r32_ri    | nd | nd   | nd    |      | 0.11  |
| r33_rbe   | nd | nd   | nd    |      | -0.46 |
| r34_rbe   | nd | nd   | nd    |      | -0.56 |
| r35_tkt   | nd | nd   | nd    |      | -0.54 |
| r36_tkt   | nd | nd   | nd    |      | -0.57 |
| r37_tal   | nd | nd   | nd    |      | -1.49 |
| r38_tal   | nd | nd   | nd    |      | -2.04 |
| r39_tkt   | nd | nd   | nd    |      | -1.12 |
| r40_tkt   | nd | nd   | nd    |      | -1.58 |

---
